# Supplementary material for: Transplastomic integration of a cyanobacterial bicarbonate transporter into tobacco chloroplasts
Source: PubMed Central journal article supplement (PMC4071830; doi:10.1093/jxb/eru156), 2014-04-18

**Transplastomic integration of a cyanobacteria bicarbonate transporter into tobacco chloroplasts. JLL Pengelly, B Forster, S von Caemmerer, MR Badger, GD Price, SM Whitney**

**SUPPLEMENTARY DATA**

**Supplementary figure S1.**

Representative RNA (Northern) and protein (Western) blots of steady state mRNA pools and their translated protein products from the same area of leaf taken from comparable positions in the upper canopy of  $25.0 \pm 1.4$  cm in height wild-type tobacco and *tob<sup>BicA</sup>* plants (lanes represent leaves 4-8 from the apical meristem). Data from such analyses were used to quantify the leaf mRNA steady state levels and the corresponding amounts of D1, NtAQ1 and BicA shown in Fig. 3. The detected levels of Rubisco L-subunit (LSU) were used to confirm the amount of leaf Rubisco L<sub>8</sub>S<sub>8</sub> holoenzyme quantified by [<sup>14</sup>C]-CABP binding.

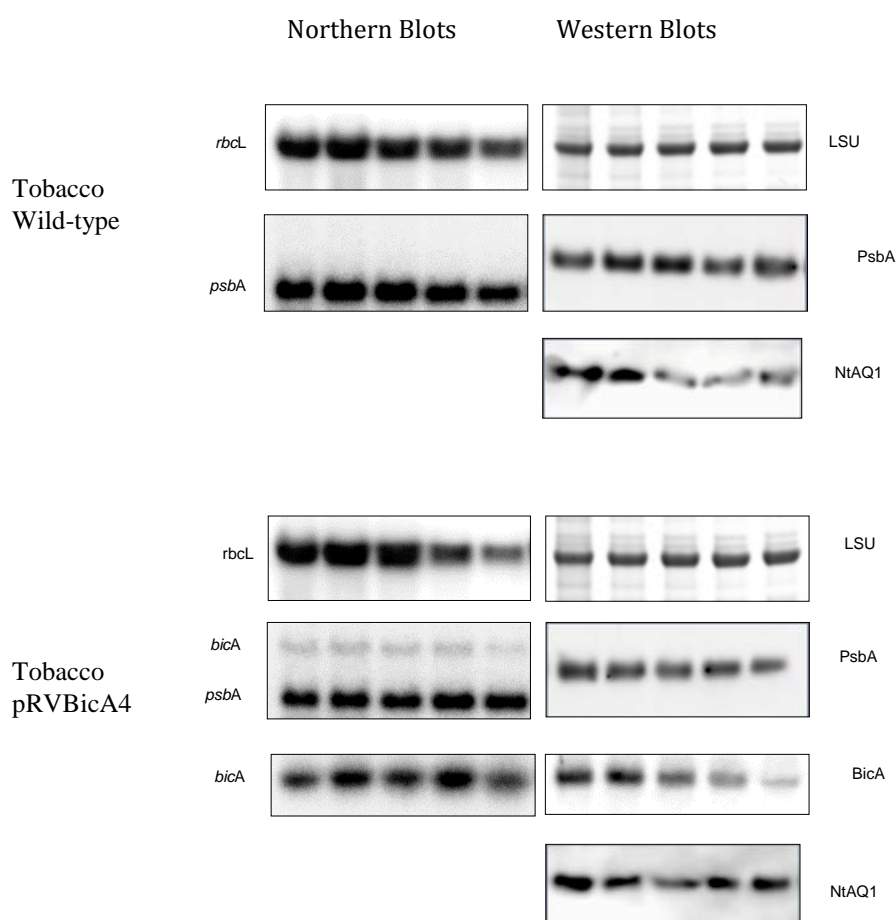

**Supplementary figure S2.**

Transmission electron microscope images showing the comparable chloroplast ultrastructure in leaves of *tob<sup>BicA</sup>* (A, B) and wild-type tobacco (C, D).

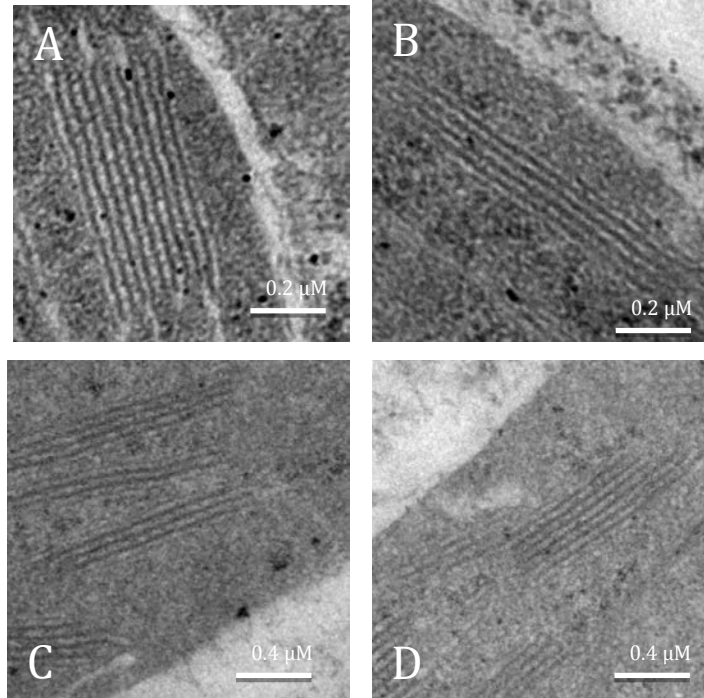

Supplement: supp_eru156_jexbot119446_file001.pdf [file supp_eru156_jexbot119446_file001.pdf]
